# Supplementary material for: Influence of N-donor bases and the solvent in oxodiperoxomolybdenum catalysed olefin epoxidation with hydrogen peroxide in ionic liquids
Source: Royal Society of Chemistry journal article supplement (doi:10.1039/c1dt10065c), 2011-01-01

## Electronic Supplementary Information (ESI)

### Influence of N-donor bases and the solvent in oxodiperoxomolybdenum catalysed olefin epoxidation in ionic liquids

Matthew Herbert,<sup>a</sup> Francisco Montilla,<sup>\*a</sup> Agustín Galindo,<sup>\*a</sup> Raquel Moyano,<sup>a</sup> Antonio Pastor,<sup>a</sup> and Eleuterio Álvarez<sup>b</sup>

<sup>a</sup>*Departamento de Química Inorgánica, Facultad de Química, Universidad de Sevilla, Aptdo 1203, 41071 Sevilla, Spain.* <sup>b</sup>*Instituto de Investigaciones Químicas, CSIC - Universidad de Sevilla, Avda. Américo Vespucio 49, Isla de La Cartuja, 41092 Sevilla, Spain*

**Table S1.** Comparing the effect of imidazole additives in the molybdenum catalysed epoxidation of *cis*-cyclooctene in IL solvents over 2 h.<sup>a</sup>

**Scheme S1.** Oxidative decomposition of 4-methylimidazole.

**Table S2.** Epoxide yields for ten catalytic cycles in C<sub>8</sub>mim-PF<sub>6</sub> as solvent in the presence of [Mo(O)(O<sub>2</sub>)<sub>2</sub>(H<sub>2</sub>O)<sub>n</sub>]/dmpz (dmpz = 3,5-dimethylpyrazole).

**Table S3.** Crystal data and structure refinement for [MoO(O<sub>2</sub>)<sub>2</sub>(3-Mepz)<sub>2</sub>].

**Table S4.** Atomic coordinates (x 10<sup>4</sup>) and equivalent isotropic displacement parameters (Å<sup>2</sup>x10<sup>3</sup>) for [MoO(O<sub>2</sub>)<sub>2</sub>(3-Mepz)<sub>2</sub>]. U(eq) is defined as one third of the trace of the orthogonalized U<sub>ij</sub> tensor.

**Table S5.** Bond lengths [Å] and angles [°] for [MoO(O<sub>2</sub>)<sub>2</sub>(3-Mepz)<sub>2</sub>].

**Table S6.** Anisotropic displacement parameters (Å<sup>2</sup>x 10<sup>3</sup>) for [MoO(O<sub>2</sub>)<sub>2</sub>(3-Mepz)<sub>2</sub>]. The anisotropic displacement factor exponent takes the form:  $-2\pi^2 [h^2 a^{*2} U^{11} + \dots + 2 h k a^* b^* U^{12}]$ .

**Table S7.** Hydrogen coordinates (x 10<sup>4</sup>) and isotropic displacement parameters (Å<sup>2</sup>x 10<sup>3</sup>) for [MoO(O<sub>2</sub>)<sub>2</sub>(3-Mepz)<sub>2</sub>].

**Table S8.** Torsion angles [°] for [MoO(O<sub>2</sub>)<sub>2</sub>(3-Mepz)<sub>2</sub>].

**Table S9.** Hydrogen bonds for [MoO(O<sub>2</sub>)<sub>2</sub>(3-Mepz)<sub>2</sub>] [Å and °].

**Figure 1.** Intra and intermolecular hydrogen bonds for [MoO(O<sub>2</sub>)<sub>2</sub>(3-Mepz)<sub>2</sub>].

**Figure 2.** Crystal packing for [MoO(O<sub>2</sub>)<sub>2</sub>(3-Mepz)<sub>2</sub>].

**Table S1.** Comparing the effect of imidazole additives in the molybdenum catalysed epoxidation of *cis*-cyclooctene in IL solvents over 2 h.<sup>a</sup>

| Entry | Base Additive [ $pK_a$ ] | Solvent                             | Conversion (%) | Yield (%) | Selectivity (%) |
|-------|--------------------------|-------------------------------------|----------------|-----------|-----------------|
| 1     | Imidazole [6.95]         | C <sub>8</sub> mim-PF <sub>6</sub>  | 48             | 48        | 100             |
| 2     |                          | C <sub>12</sub> mim-PF <sub>6</sub> | 43             | 43        | 100             |
| 3     | 1-Methylimidazole [6.95] | C <sub>8</sub> mim-PF <sub>6</sub>  | 48             | 48        | 100             |
| 4     |                          | C <sub>12</sub> mim-PF <sub>6</sub> | 44             | 44        | 100             |
| 5     | 4-Methylimidazole [7.40] | C <sub>8</sub> mim-PF <sub>6</sub>  | 45             | 45        | 100             |
| 6     |                          | C <sub>12</sub> mim-PF <sub>6</sub> | 44             | 44        | 100             |

<sup>a</sup> Aqueous [Mo(O)(O<sub>2</sub>)<sub>2</sub>(H<sub>2</sub>O)<sub>n</sub>] 0.025 mmol, base additive 0.10 mmol, 30 % aqueous H<sub>2</sub>O<sub>2</sub> 3.0 mmol, *cis*-cyclooctene 1.0 mmol, solvent 2.0 mL, T = 60 °C, t = 2 h. Extraction with pentane (3 x 3 mL), yields and conversions calculated by GC.

**Scheme S1.** Oxidative decomposition of 4-methylimidazole.

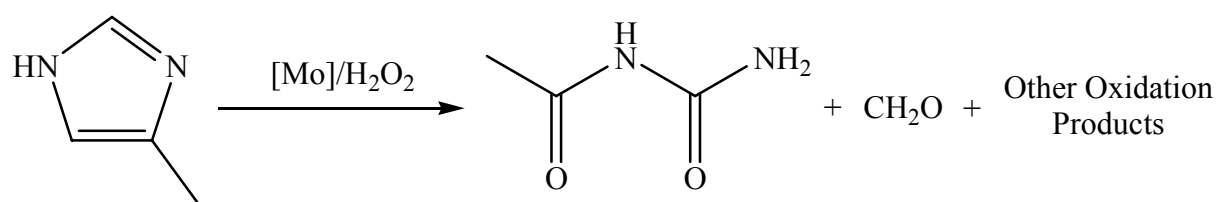

**Table S2.** Epoxide yields for ten catalytic cycles in C<sub>8</sub>mim-PF<sub>6</sub> as solvent in the presence of [Mo(O)(O<sub>2</sub>)<sub>2</sub>(H<sub>2</sub>O)<sub>n</sub>]/dmpz (dmpz = 3,5-dimethylpyrazole).<sup>a</sup>

| Catalytic cycle | Yields (%)                   |                           |                              |                           |
|-----------------|------------------------------|---------------------------|------------------------------|---------------------------|
|                 | Time = 4h                    |                           | Time = 2h                    |                           |
|                 | With added dmpz <sup>b</sup> | Without dmpz <sup>c</sup> | With added dmpz <sup>b</sup> | Without dmpz <sup>c</sup> |
| 1               | 89.3                         | 86.0                      | 95                           | 95                        |
| 2               | 71.8                         | 78.5                      | 99                           | 97                        |
| 3               | 84.8                         | 77.8                      | 96                           | 93                        |
| 4               | 77.1                         | 69.6                      | 97                           | 86                        |
| 5               | 70.6                         | 55.8                      | 97                           | 77                        |
| 6               | 73.1                         | 58.2                      | 96                           | 70                        |
| 7               | 81.8                         | 61.2                      | 95                           | 70                        |
| 8               | 83.4                         | 36.4                      | 98                           | 67                        |
| 9               | 79.4                         | 34.4                      | 96                           | 66                        |
| 10              | 82.3                         | 25.8                      | 99                           | 62                        |

Initially: Aqueous [Mo(O)(O<sub>2</sub>)<sub>2</sub>(H<sub>2</sub>O)<sub>n</sub>] 0.025 mmol, 3,5-dimethylpyrazole 0.1 mmol, 30 % aqueous H<sub>2</sub>O<sub>2</sub> 3.0 mmol, *cis*-cyclooctene 1.0 mmol, C<sub>8</sub>mim-PF<sub>6</sub> 2.0 mL. Extraction with petroleum ether (3 x 3 mL) after each cycle, yields calculated by GC. T = 60 °C, t<sub>run</sub> = 2 h. <sup>b</sup> 30 % H<sub>2</sub>O<sub>2</sub> (aq) 3.0 mmol, *cis*-cyclooctene 1.0 mmol, 3,5-dimethylpyrazole 0.1 mmol added prior to each successive run. <sup>c</sup> 30 % H<sub>2</sub>O<sub>2</sub> (aq) 3.0 mmol, *cis*-cyclooctene 1.0 mmol added prior to each successive run.

**Table S3.** Crystal data and structure refinement for [MoO(O<sub>2</sub>)<sub>2</sub>(3-Mepz)<sub>2</sub>].

|                                   |                                                                                                     |
|-----------------------------------|-----------------------------------------------------------------------------------------------------|
| Empirical formula                 | C <sub>8</sub> H <sub>12</sub> MoN <sub>4</sub> O <sub>5</sub>                                      |
| Formula weight                    | 340.16                                                                                              |
| Temperature                       | 173(2) K                                                                                            |
| Wavelength                        | 0.71073 Å                                                                                           |
| Crystal system                    | Monoclinic                                                                                          |
| Space group                       | P2 <sub>1</sub> /c                                                                                  |
| Unit cell dimensions              | a = 11.4740(3) Å    α = 90°.<br>b = 13.3115(4) Å    β = 104.148(2)°.<br>c = 8.5537(3) Å    γ = 90°. |
| Volume                            | 1266.83(7) Å <sup>3</sup>                                                                           |
| Z                                 | 4                                                                                                   |
| Density (calculated)              | 1.783 Mg/m <sup>3</sup>                                                                             |
| Absorption coefficient            | 1.055 mm <sup>-1</sup>                                                                              |
| F(000)                            | 680                                                                                                 |
| Crystal size                      | 0.47 x 0.32 x 0.13 mm <sup>3</sup>                                                                  |
| Theta range for data collection   | 4.17 to 30.62°.                                                                                     |
| Index ranges                      | -15 ≤ h ≤ 16, -19 ≤ k ≤ 19, -12 ≤ l ≤ 11                                                            |
| Reflections collected             | 39044                                                                                               |
| Independent reflections           | 3882 [R(int) = 0.0300]                                                                              |
| Completeness to theta = 30.62°    | 99.3 %                                                                                              |
| Absorption correction             | Semi-empirical from equivalents                                                                     |
| Max. and min. transmission        | 0.8751 and 0.6770                                                                                   |
| Refinement method                 | Full-matrix least-squares on F <sup>2</sup>                                                         |
| Data / restraints / parameters    | 3882 / 2 / 171                                                                                      |
| Goodness-of-fit on F <sup>2</sup> | 1.066                                                                                               |
| Final R indices [I > 2σ(I)]       | R1 = 0.0190, wR2 = 0.0507                                                                           |
| R indices (all data)              | R1 = 0.0219, wR2 = 0.0515                                                                           |
| Largest diff. peak and hole       | 0.370 and -0.619 eÅ <sup>-3</sup>                                                                   |

**Table S4.** Atomic coordinates ( $\times 10^4$ ) and equivalent isotropic displacement parameters ( $\text{\AA}^2 \times 10^3$ ) for  $[\text{MoO}(\text{O}_2)_2(3\text{-Mepz})_2]$ .  $U(\text{eq})$  is defined as one third of the trace of the orthogonalized  $U_{ij}$  tensor.

|       | x        | y        | z        | U(eq) |
|-------|----------|----------|----------|-------|
| Mo(1) | 2852(1)  | 193(1)   | 10128(1) | 17(1) |
| O(1)  | 3759(1)  | -803(1)  | 10690(1) | 26(1) |
| O(2)  | 3469(1)  | 1163(1)  | 11783(1) | 28(1) |
| O(3)  | 4031(1)  | 1287(1)  | 10420(1) | 26(1) |
| O(4)  | 1528(1)  | -61(1)   | 11094(1) | 24(1) |
| O(5)  | 1285(1)  | -461(1)  | 9442(1)  | 23(1) |
| N(1)  | 3024(1)  | -23(1)   | 7673(1)  | 22(1) |
| N(2)  | 3831(1)  | -680(1)  | 7325(1)  | 21(1) |
| N(3)  | 1636(1)  | 1523(1)  | 8900(1)  | 21(1) |
| N(4)  | 429(1)   | 1496(1)  | 8682(2)  | 23(1) |
| C(1)  | 3660(1)  | -814(1)  | 5733(2)  | 26(1) |
| C(2)  | 2689(2)  | -226(1)  | 5008(2)  | 36(1) |
| C(3)  | 2326(2)  | 253(1)   | 6251(2)  | 33(1) |
| C(4)  | 4414(2)  | -1498(2) | 5016(2)  | 38(1) |
| C(5)  | -95(1)   | 2369(1)  | 8127(2)  | 24(1) |
| C(6)  | 813(1)   | 2993(1)  | 7927(2)  | 34(1) |
| C(7)  | 1866(1)  | 2437(1)  | 8432(2)  | 31(1) |
| C(8)  | -1422(1) | 2524(1)  | 7835(2)  | 38(1) |

**Table S5.** Bond lengths [Å] and angles [°] for [MoO(O<sub>2</sub>)<sub>2</sub>(3-Mepz)<sub>2</sub>].

|                 |            |                 |            |
|-----------------|------------|-----------------|------------|
| Mo(1)-O(1)      | 1.6818(10) | C(1)-C(2)       | 1.379(2)   |
| Mo(1)-O(2)      | 1.9192(10) | C(1)-C(4)       | 1.488(2)   |
| Mo(1)-O(4)      | 1.9280(10) | C(2)-C(3)       | 1.388(2)   |
| Mo(1)-O(5)      | 1.9540(10) | C(2)-H(2)       | 0.9500     |
| Mo(1)-O(3)      | 1.9622(10) | C(3)-H(3)       | 0.9500     |
| Mo(1)-N(1)      | 2.1754(12) | C(4)-H(4A)      | 0.9800     |
| Mo(1)-N(3)      | 2.3387(11) | C(4)-H(4B)      | 0.9800     |
| O(2)-O(3)       | 1.4734(15) | C(4)-H(4C)      | 0.9800     |
| O(4)-O(5)       | 1.4714(14) | C(5)-C(6)       | 1.375(2)   |
| N(1)-C(3)       | 1.3343(19) | C(5)-C(8)       | 1.496(2)   |
| N(1)-N(2)       | 1.3588(16) | C(6)-C(7)       | 1.392(2)   |
| N(2)-C(1)       | 1.3395(17) | C(6)-H(6)       | 0.9500     |
| N(2)-H(2N)      | 0.827(14)  | C(7)-H(7)       | 0.9500     |
| N(3)-C(7)       | 1.3261(18) | C(8)-H(8A)      | 0.9800     |
| N(3)-N(4)       | 1.3526(15) | C(8)-H(8B)      | 0.9800     |
| N(4)-C(5)       | 1.3408(17) | C(8)-H(8C)      | 0.9800     |
| N(4)-H(4N)      | 0.833(14)  |                 |            |
|                 |            |                 |            |
| O(1)-Mo(1)-O(2) | 103.21(5)  | O(3)-Mo(1)-N(1) | 89.90(5)   |
| O(1)-Mo(1)-O(4) | 103.69(5)  | O(1)-Mo(1)-N(3) | 170.08(5)  |
| O(2)-Mo(1)-O(4) | 89.37(5)   | O(2)-Mo(1)-N(3) | 83.90(4)   |
| O(1)-Mo(1)-O(5) | 101.21(5)  | O(4)-Mo(1)-N(3) | 83.07(4)   |
| O(2)-Mo(1)-O(5) | 131.88(4)  | O(5)-Mo(1)-N(3) | 78.38(4)   |
| O(4)-Mo(1)-O(5) | 44.54(4)   | O(3)-Mo(1)-N(3) | 79.16(4)   |
| O(1)-Mo(1)-O(3) | 100.92(5)  | N(1)-Mo(1)-N(3) | 81.45(4)   |
| O(2)-Mo(1)-O(3) | 44.60(4)   | O(3)-O(2)-Mo(1) | 69.25(6)   |
| O(4)-Mo(1)-O(3) | 131.80(4)  | O(2)-O(3)-Mo(1) | 66.15(6)   |
| O(5)-Mo(1)-O(3) | 157.55(4)  | O(5)-O(4)-Mo(1) | 68.67(6)   |
| O(1)-Mo(1)-N(1) | 88.63(5)   | O(4)-O(5)-Mo(1) | 66.79(6)   |
| O(2)-Mo(1)-N(1) | 134.15(5)  | C(3)-N(1)-N(2)  | 105.49(12) |
| O(4)-Mo(1)-N(1) | 131.10(5)  | C(3)-N(1)-Mo(1) | 131.88(11) |
| O(5)-Mo(1)-N(1) | 86.87(5)   | N(2)-N(1)-Mo(1) | 121.61(9)  |

|                 |            |                  |            |
|-----------------|------------|------------------|------------|
| C(1)-N(2)-N(1)  | 111.72(12) | H(4A)-C(4)-H(4B) | 109.5      |
| C(1)-N(2)-H(2N) | 128.3(13)  | C(1)-C(4)-H(4C)  | 109.5      |
| N(1)-N(2)-H(2N) | 119.9(13)  | H(4A)-C(4)-H(4C) | 109.5      |
| C(7)-N(3)-N(4)  | 104.78(11) | H(4B)-C(4)-H(4C) | 109.5      |
| C(7)-N(3)-Mo(1) | 133.58(10) | N(4)-C(5)-C(6)   | 106.24(13) |
| N(4)-N(3)-Mo(1) | 121.32(8)  | N(4)-C(5)-C(8)   | 121.85(13) |
| C(5)-N(4)-N(3)  | 112.38(11) | C(6)-C(5)-C(8)   | 131.91(13) |
| C(5)-N(4)-H(4N) | 128.0(13)  | C(5)-C(6)-C(7)   | 105.47(13) |
| N(3)-N(4)-H(4N) | 119.5(13)  | C(5)-C(6)-H(6)   | 127.3      |
| N(2)-C(1)-C(2)  | 106.46(13) | C(7)-C(6)-H(6)   | 127.3      |
| N(2)-C(1)-C(4)  | 123.03(14) | N(3)-C(7)-C(6)   | 111.11(13) |
| C(2)-C(1)-C(4)  | 130.50(14) | N(3)-C(7)-H(7)   | 124.4      |
| C(1)-C(2)-C(3)  | 106.07(14) | C(6)-C(7)-H(7)   | 124.4      |
| C(1)-C(2)-H(2)  | 127.0      | C(5)-C(8)-H(8A)  | 109.5      |
| C(3)-C(2)-H(2)  | 127.0      | C(5)-C(8)-H(8B)  | 109.5      |
| N(1)-C(3)-C(2)  | 110.25(14) | H(8A)-C(8)-H(8B) | 109.5      |
| N(1)-C(3)-H(3)  | 124.9      | C(5)-C(8)-H(8C)  | 109.5      |
| C(2)-C(3)-H(3)  | 124.9      | H(8A)-C(8)-H(8C) | 109.5      |
| C(1)-C(4)-H(4A) | 109.5      | H(8B)-C(8)-H(8C) | 109.5      |
| C(1)-C(4)-H(4B) | 109.5      |                  |            |

---

**Table S6.** Anisotropic displacement parameters ( $\text{\AA}^2 \times 10^3$ ) for  $[\text{MoO}(\text{O}_2)_2(3\text{-Mepz})_2]$ . The anisotropic displacement factor exponent takes the form:  $-2\pi^2[h^2 a^{*2}U^{11} + \dots + 2 h k a^* b^* U^{12}]$ .

|       | U11   | U22   | U33   | U23    | U13   | U12   |
|-------|-------|-------|-------|--------|-------|-------|
| Mo(1) | 14(1) | 20(1) | 17(1) | 1(1)   | 5(1)  | 2(1)  |
| O(1)  | 24(1) | 29(1) | 26(1) | 4(1)   | 6(1)  | 9(1)  |
| O(2)  | 21(1) | 37(1) | 25(1) | -10(1) | 7(1)  | -1(1) |
| O(3)  | 17(1) | 30(1) | 30(1) | -2(1)  | 8(1)  | -3(1) |
| O(4)  | 22(1) | 28(1) | 25(1) | 2(1)   | 11(1) | -1(1) |
| O(5)  | 21(1) | 22(1) | 25(1) | -1(1)  | 5(1)  | -3(1) |
| N(1)  | 21(1) | 26(1) | 19(1) | 1(1)   | 6(1)  | 4(1)  |
| N(2)  | 17(1) | 27(1) | 19(1) | -2(1)  | 5(1)  | 2(1)  |
| N(3)  | 15(1) | 21(1) | 28(1) | 4(1)   | 6(1)  | 0(1)  |
| N(4)  | 16(1) | 20(1) | 35(1) | 8(1)   | 8(1)  | 0(1)  |
| C(1)  | 24(1) | 34(1) | 21(1) | -5(1)  | 7(1)  | -2(1) |
| C(2)  | 41(1) | 48(1) | 19(1) | 0(1)   | 5(1)  | 10(1) |
| C(3)  | 34(1) | 42(1) | 22(1) | 3(1)   | 4(1)  | 13(1) |
| C(4)  | 32(1) | 52(1) | 29(1) | -15(1) | 9(1)  | 3(1)  |
| C(5)  | 23(1) | 21(1) | 29(1) | 7(1)   | 5(1)  | 3(1)  |
| C(6)  | 27(1) | 23(1) | 48(1) | 14(1)  | 5(1)  | -1(1) |
| C(7)  | 21(1) | 27(1) | 45(1) | 13(1)  | 7(1)  | -4(1) |
| C(8)  | 23(1) | 32(1) | 58(1) | 16(1)  | 10(1) | 8(1)  |



**Table S7.** Hydrogen coordinates ( $\times 10^4$ ) and isotropic displacement parameters ( $\text{\AA}^2 \times 10^3$ ) for  $[\text{MoO}(\text{O}_2)_2(3\text{-Mepz})_2]$ .

|       | x        | y        | z        | U(eq) |
|-------|----------|----------|----------|-------|
| H(2N) | 4369(15) | -914(13) | 8060(20) | 26    |
| H(4N) | 108(16)  | 988(12)  | 8960(20) | 28    |
| H(2)  | 2339     | -161     | 3885     | 44    |
| H(3)  | 1674     | 712      | 6110     | 39    |
| H(4A) | 5253     | -1275    | 5330     | 56    |
| H(4B) | 4132     | -1485    | 3838     | 56    |
| H(4C) | 4356     | -2184    | 5406     | 56    |
| H(6)  | 738      | 3662     | 7529     | 40    |
| H(7)  | 2646     | 2680     | 8441     | 38    |
| H(8A) | -1787    | 1930     | 8198     | 56    |
| H(8B) | -1769    | 2628     | 6681     | 56    |
| H(8C) | -1580    | 3114     | 8436     | 56    |

**Table S8.** Torsion angles [°] for [MoO(O<sub>2</sub>)<sub>2</sub>(3-Mepz)<sub>2</sub>].

---

|                      |             |
|----------------------|-------------|
| O(1)-Mo(1)-O(2)-O(3) | 92.24(7)    |
| O(4)-Mo(1)-O(2)-O(3) | -163.84(6)  |
| O(5)-Mo(1)-O(2)-O(3) | -149.16(6)  |
| N(1)-Mo(1)-O(2)-O(3) | -8.94(9)    |
| N(3)-Mo(1)-O(2)-O(3) | -80.74(6)   |
| O(1)-Mo(1)-O(3)-O(2) | -97.81(7)   |
| O(4)-Mo(1)-O(3)-O(2) | 21.92(9)    |
| O(5)-Mo(1)-O(3)-O(2) | 92.05(12)   |
| N(1)-Mo(1)-O(3)-O(2) | 173.60(6)   |
| N(3)-Mo(1)-O(3)-O(2) | 92.29(6)    |
| O(1)-Mo(1)-O(4)-O(5) | -92.16(7)   |
| O(2)-Mo(1)-O(4)-O(5) | 164.39(6)   |
| O(3)-Mo(1)-O(4)-O(5) | 149.20(6)   |
| N(1)-Mo(1)-O(4)-O(5) | 8.21(8)     |
| N(3)-Mo(1)-O(4)-O(5) | 80.47(6)    |
| O(1)-Mo(1)-O(5)-O(4) | 98.20(7)    |
| O(2)-Mo(1)-O(5)-O(4) | -21.18(9)   |
| O(3)-Mo(1)-O(5)-O(4) | -91.66(12)  |
| N(1)-Mo(1)-O(5)-O(4) | -173.81(6)  |
| N(3)-Mo(1)-O(5)-O(4) | -91.90(6)   |
| O(1)-Mo(1)-N(1)-C(3) | 157.10(15)  |
| O(2)-Mo(1)-N(1)-C(3) | -95.71(16)  |
| O(4)-Mo(1)-N(1)-C(3) | 50.04(17)   |
| O(5)-Mo(1)-N(1)-C(3) | 55.80(15)   |
| O(3)-Mo(1)-N(1)-C(3) | -101.97(15) |
| N(3)-Mo(1)-N(1)-C(3) | -22.92(15)  |
| O(1)-Mo(1)-N(1)-N(2) | -9.53(11)   |
| O(2)-Mo(1)-N(1)-N(2) | 97.66(11)   |
| O(4)-Mo(1)-N(1)-N(2) | -116.59(10) |
| O(5)-Mo(1)-N(1)-N(2) | -110.84(11) |
| O(3)-Mo(1)-N(1)-N(2) | 91.40(11)   |
| N(3)-Mo(1)-N(1)-N(2) | 170.45(11)  |

|                      |             |
|----------------------|-------------|
| C(3)-N(1)-N(2)-C(1)  | 0.40(17)    |
| Mo(1)-N(1)-N(2)-C(1) | 170.11(10)  |
| O(2)-Mo(1)-N(3)-C(7) | 57.60(15)   |
| O(4)-Mo(1)-N(3)-C(7) | 147.70(16)  |
| O(5)-Mo(1)-N(3)-C(7) | -167.38(16) |
| O(3)-Mo(1)-N(3)-C(7) | 12.72(15)   |
| N(1)-Mo(1)-N(3)-C(7) | -78.83(15)  |
| O(2)-Mo(1)-N(3)-N(4) | -114.75(11) |
| O(4)-Mo(1)-N(3)-N(4) | -24.64(11)  |
| O(5)-Mo(1)-N(3)-N(4) | 20.28(10)   |
| O(3)-Mo(1)-N(3)-N(4) | -159.62(11) |
| N(1)-Mo(1)-N(3)-N(4) | 108.83(11)  |
| C(7)-N(3)-N(4)-C(5)  | -1.26(18)   |
| Mo(1)-N(3)-N(4)-C(5) | 173.01(10)  |
| N(1)-N(2)-C(1)-C(2)  | -0.60(18)   |
| N(1)-N(2)-C(1)-C(4)  | -179.78(14) |
| N(2)-C(1)-C(2)-C(3)  | 0.5(2)      |
| C(4)-C(1)-C(2)-C(3)  | 179.64(18)  |
| N(2)-N(1)-C(3)-C(2)  | -0.03(19)   |
| Mo(1)-N(1)-C(3)-C(2) | -168.24(12) |
| C(1)-C(2)-C(3)-N(1)  | -0.3(2)     |
| N(3)-N(4)-C(5)-C(6)  | 1.69(18)    |
| N(3)-N(4)-C(5)-C(8)  | -178.41(15) |
| N(4)-C(5)-C(6)-C(7)  | -1.38(19)   |
| C(8)-C(5)-C(6)-C(7)  | 178.73(19)  |
| N(4)-N(3)-C(7)-C(6)  | 0.32(19)    |
| Mo(1)-N(3)-C(7)-C(6) | -172.92(12) |
| C(5)-C(6)-C(7)-N(3)  | 0.7(2)      |

---

**Table S9.** Hydrogen bonds for [MoO(O<sub>2</sub>)<sub>2</sub>(3-Mepz)<sub>2</sub>] [Å and °].

| D-H...A             | d(D-H)    | d(H...A)  | d(D...A)   | <(DHA)    |
|---------------------|-----------|-----------|------------|-----------|
| N(2)-H(2N)...O(3)#1 | 0.827(14) | 2.035(15) | 2.8421(16) | 165.3(18) |
| N(2)-H(2N)...O(2)#1 | 0.827(14) | 2.474(17) | 3.0720(15) | 130.1(16) |
| N(4)-H(4N)...O(4)#2 | 0.833(14) | 2.238(16) | 2.9901(16) | 150.4(17) |
| N(4)-H(4N)...O(5)   | 0.833(14) | 2.332(18) | 2.8041(15) | 116.5(16) |
| N(4)-H(4N)...O(5)#2 | 0.833(14) | 2.446(17) | 3.1438(15) | 142.0(17) |
| N(4)-H(4N)...O(4)   | 0.833(14) | 2.545(18) | 2.9781(16) | 113.6(15) |

Symmetry transformations used to generate equivalent atoms:

#1 -x+1,-y,-z+2 #2 -x,-y,-z+2

**Figure 1.** Intra and intermolecular hydrogen bonds for [MoO(O<sub>2</sub>)<sub>2</sub>(3-Mepz)<sub>2</sub>].

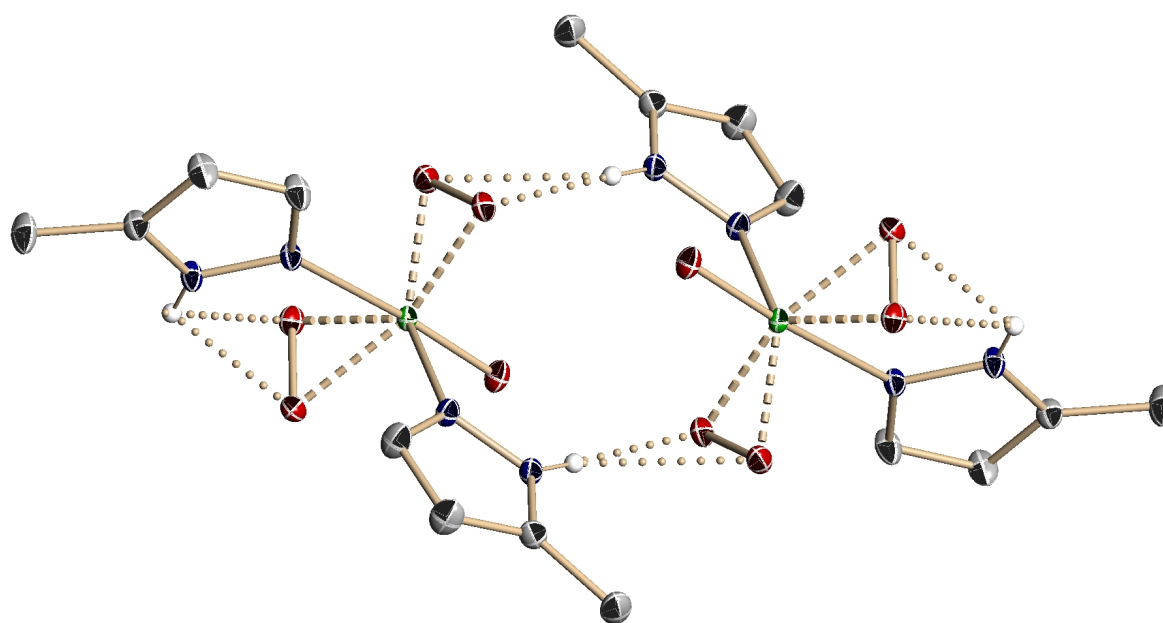

**Figure 2.** Crystal packing for  $[\text{MoO}(\text{O}_2)_2(3\text{-Mepz})_2]$ .

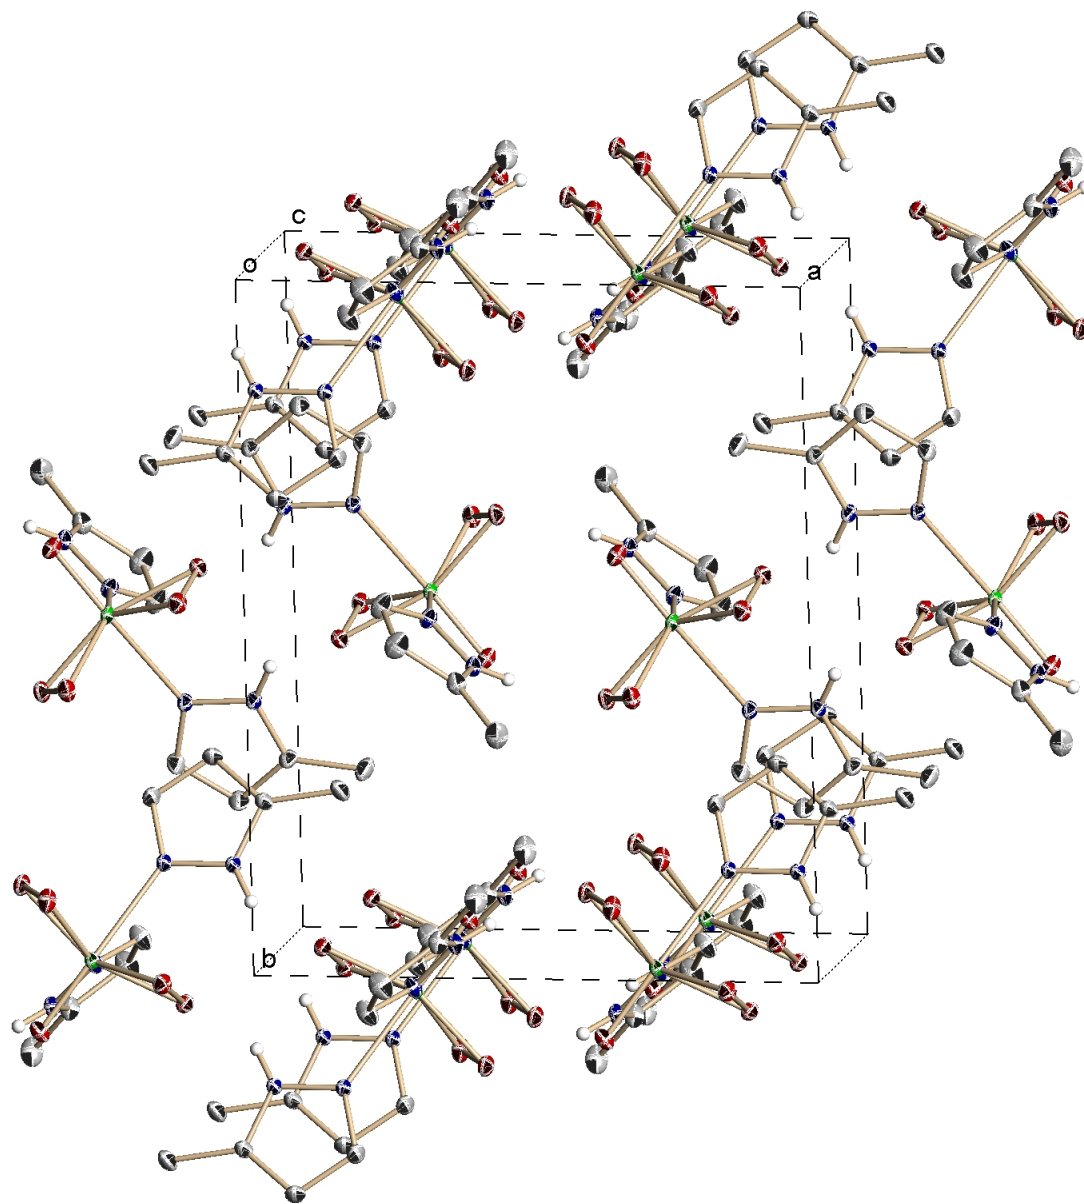

Supplement: c1dt10065c.pdf [file c1dt10065c.pdf]
